# Supplementary material for: Pair of chiral molecular ladders and successive hydration in single-crystal-to-single-crystal mode
Source: Royal Society of Chemistry journal article supplement (doi:10.1039/d1ce01332g), 2021-01-01
Supplement: d1ce01332g1.pdf [file d1ce01332g1.pdf]

<Electronic Supplementary Information>

**Pair of chiral molecular ladders and successive hydration in single-crystal-to-single-crystal mode**

Junmyeong Park,<sup>a</sup> Dongwon Kim,<sup>a</sup> Dongwook Kim,<sup>b</sup> and Ok-Sang Jung\*<sup>a</sup>

<sup>a</sup>Department of Chemistry, Pusan National University, Busan 46241, Republic of Korea Fax: (+82) 51-5163522;  
Tel: (+82) 51-5103240; E-mail: oksjung@pusan.ac.kr

<sup>b</sup>Center for Catalytic Hydrocarbon Functionalizations, Institute for Basic Science (IBS), Daejeon 34141, Republic of Korea

Electronic Supplementary Information (ESI) available: <sup>1</sup>H NMR spectra and IR spectra of 1*S*,2*R*-L, 1*R*,2*S*-L, CH<sub>2</sub>Cl<sub>2</sub>·2CH<sub>3</sub>CN@[Zn<sub>3</sub>(NO<sub>3</sub>)<sub>6</sub>(1*S*,2*R*-L)<sub>2</sub>] CH<sub>2</sub>Cl<sub>2</sub>·2CH<sub>3</sub>CN@[Zn<sub>3</sub>(NO<sub>3</sub>)<sub>6</sub>(1*R*,2*S*-L)<sub>2</sub>], 2CH<sub>3</sub>CN@[Zn<sub>3</sub>(NO<sub>3</sub>)<sub>6</sub>(1*S*,2*R*-L)<sub>2</sub>(H<sub>2</sub>O)<sub>2</sub>] and 2CH<sub>3</sub>CN@[Zn<sub>3</sub>(NO<sub>3</sub>)<sub>6</sub>(1*R*,2*S*-L)<sub>2</sub>(H<sub>2</sub>O)<sub>2</sub>]. Crystal structures of, CH<sub>2</sub>Cl<sub>2</sub>·2CH<sub>3</sub>CN@[Zn<sub>3</sub>(NO<sub>3</sub>)<sub>6</sub>(1*S*,2*R*-L)<sub>2</sub>] CH<sub>2</sub>Cl<sub>2</sub>·2CH<sub>3</sub>CN@[Zn<sub>3</sub>(NO<sub>3</sub>)<sub>6</sub>(1*R*,2*S*-L)<sub>2</sub>], 2CH<sub>3</sub>CN@[Zn<sub>3</sub>(NO<sub>3</sub>)<sub>6</sub>(1*S*,2*R*-L)<sub>2</sub>(H<sub>2</sub>O)<sub>2</sub>] and 2CH<sub>3</sub>CN@[Zn<sub>3</sub>(NO<sub>3</sub>)<sub>6</sub>(1*R*,2*S*-L)<sub>2</sub>(H<sub>2</sub>O)<sub>2</sub>]. PXRD patterns of CH<sub>2</sub>Cl<sub>2</sub>·2CH<sub>3</sub>CN@[Zn<sub>3</sub>(NO<sub>3</sub>)<sub>6</sub>(1*S*,2*R*-L)<sub>2</sub>], CH<sub>2</sub>Cl<sub>2</sub>·2CH<sub>3</sub>CN@[Zn<sub>3</sub>(NO<sub>3</sub>)<sub>6</sub>(1*R*,2*S*-L)<sub>2</sub>], 2CH<sub>3</sub>CN@[Zn<sub>3</sub>(NO<sub>3</sub>)<sub>6</sub>(1*S*,2*R*-L)<sub>2</sub>(H<sub>2</sub>O)<sub>2</sub>] and 2CH<sub>3</sub>CN@[Zn<sub>3</sub>(NO<sub>3</sub>)<sub>6</sub>(1*R*,2*S*-L)<sub>2</sub>(H<sub>2</sub>O)<sub>2</sub>].

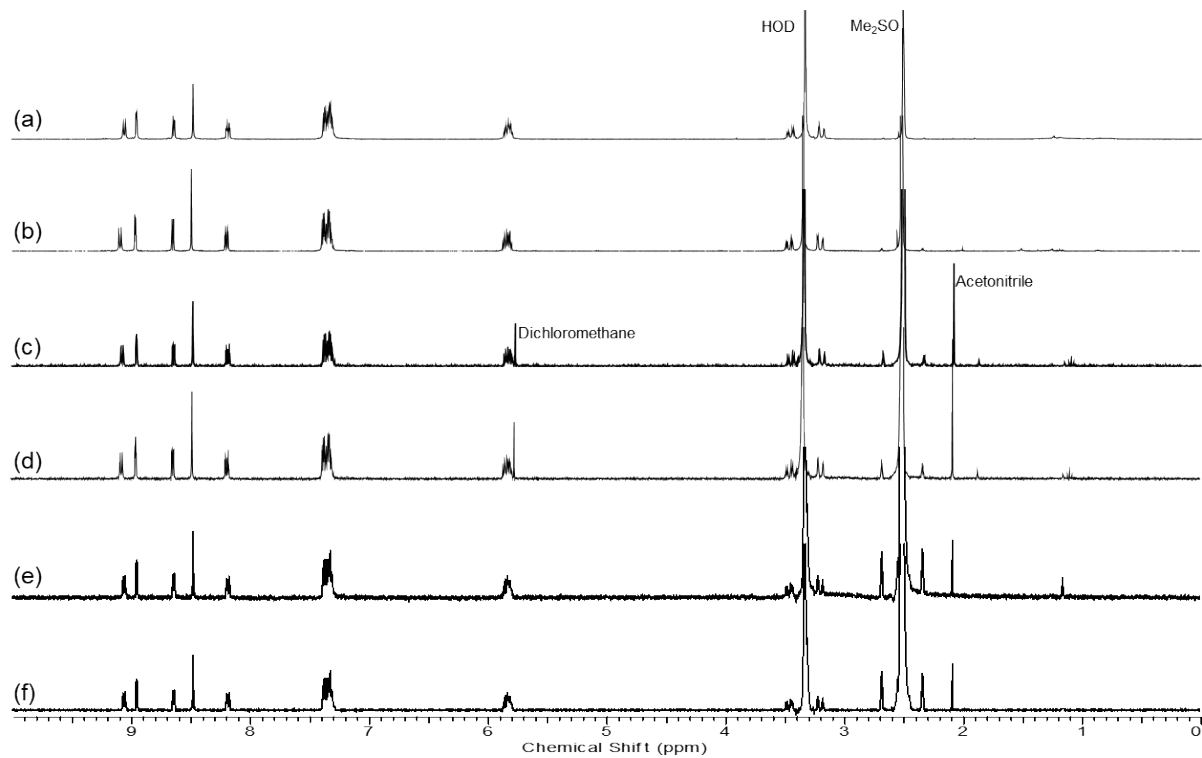

**Fig. S1**  $^1\text{H}$  NMR spectra for  $1S,2R\text{-L}$  (a),  $1R,2S\text{-L}$  (b).  $\text{CH}_2\text{Cl}_2 \cdot 2\text{CH}_3\text{CN} @ [\text{Zn}_3(\text{NO}_3)_6(1S,2R\text{-L})_2]$  (c),  $\text{CH}_2\text{Cl}_2 \cdot 2\text{CH}_3\text{CN} @ [\text{Zn}_3(\text{NO}_3)_6(1R,2S\text{-L})_2]$  (d),  $2\text{CH}_3\text{CN} @ [\text{Zn}_3(\text{NO}_3)_6(1S,2R\text{-L})_2(\text{H}_2\text{O})_2]$  (e),  $2\text{CH}_3\text{CN} @ [\text{Zn}_3(\text{NO}_3)_6(1R,2S\text{-L})_2(\text{H}_2\text{O})_2]$  (f).

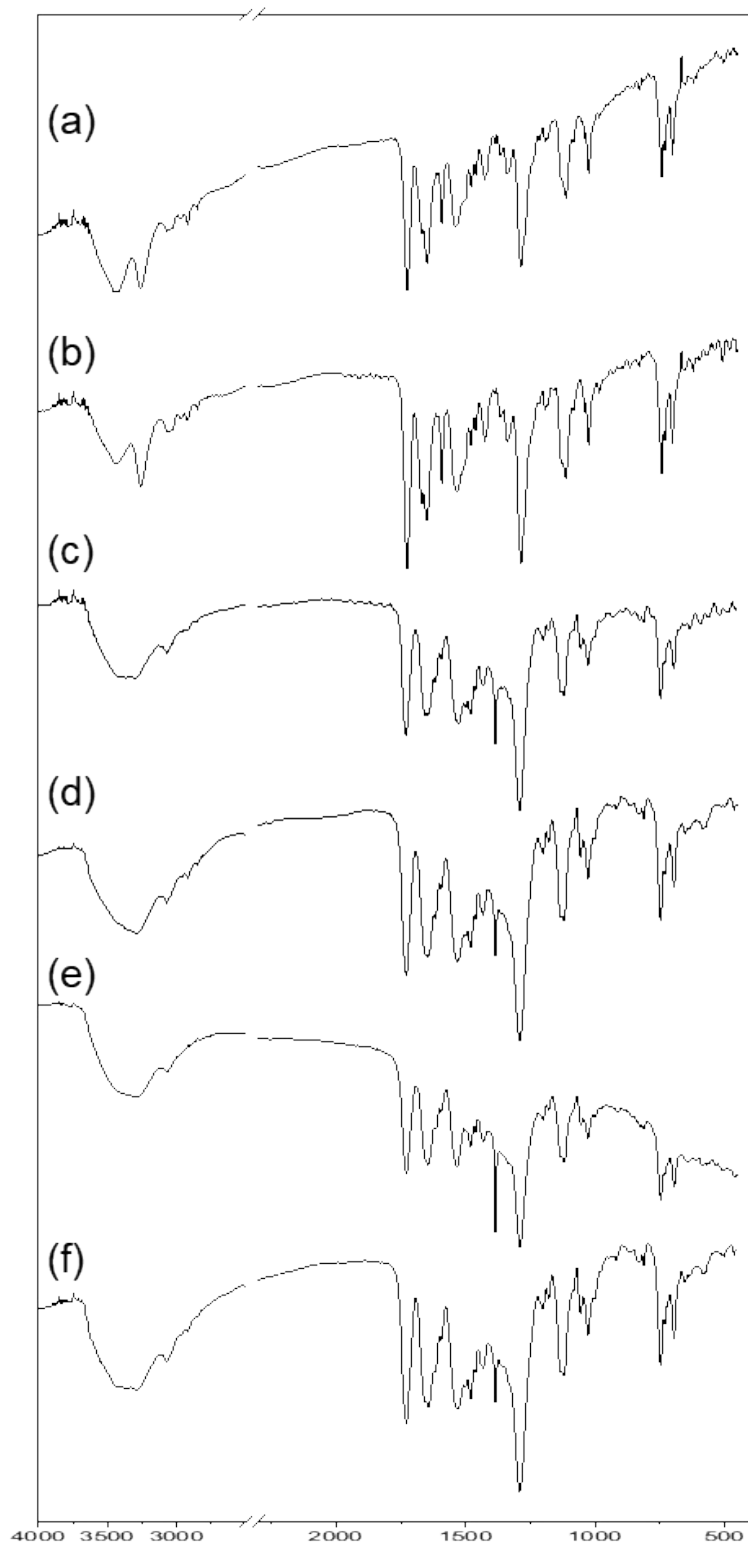

**Fig. S2** IR spectra for 1*S*,2*R*-L (a), 1*R*,2*S*-L (b).  $\text{CH}_2\text{Cl}_2 \cdot 2\text{CH}_3\text{CN} @ [\text{Zn}_3(\text{NO}_3)_6(1*S*,2*R*-L)_2]$  (c),  $\text{CH}_2\text{Cl}_2 \cdot 2\text{CH}_3\text{CN} @ [\text{Zn}_3(\text{NO}_3)_6(1*R*,2*S*-L)_2]$  (d),  $2\text{CH}_3\text{CN} @ [\text{Zn}_3(\text{NO}_3)_6(1*S*,2*R*-L)_2(\text{H}_2\text{O})_2]$  (e),  $2\text{CH}_3\text{CN} @ [\text{Zn}_3(\text{NO}_3)_6(1*R*,2*S*-L)_2(\text{H}_2\text{O})_2]$  (f).

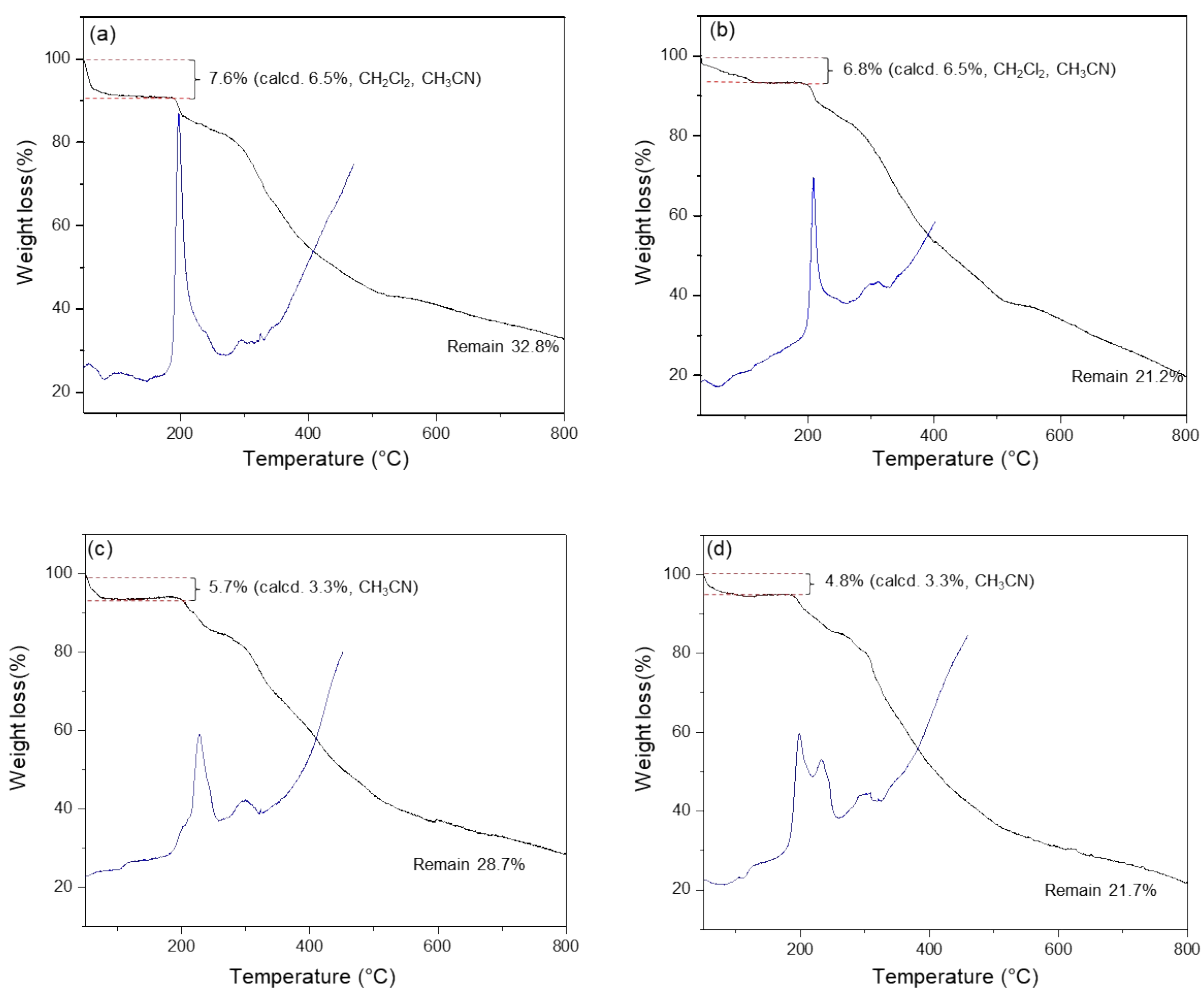

**Fig. S3** TG and DSC curves for  $\text{CH}_2\text{Cl}_2 \cdot 2\text{CH}_3\text{CN} @ [\text{Zn}_3(\text{NO}_3)_6(1S,2R-L)_2]$  (a),  $\text{CH}_2\text{Cl}_2 \cdot 2\text{CH}_3\text{CN} @ [\text{Zn}_3(\text{NO}_3)_6(1R,2S-L)_2]$  (b),  $2\text{CH}_3\text{CN} @ [\text{Zn}_3(\text{NO}_3)_6(1S,2R-L)_2(\text{H}_2\text{O})_2]$  (c),  $2\text{CH}_3\text{CN} @ [\text{Zn}_3(\text{NO}_3)_6(1R,2S-L)_2(\text{H}_2\text{O})_2]$  (d).

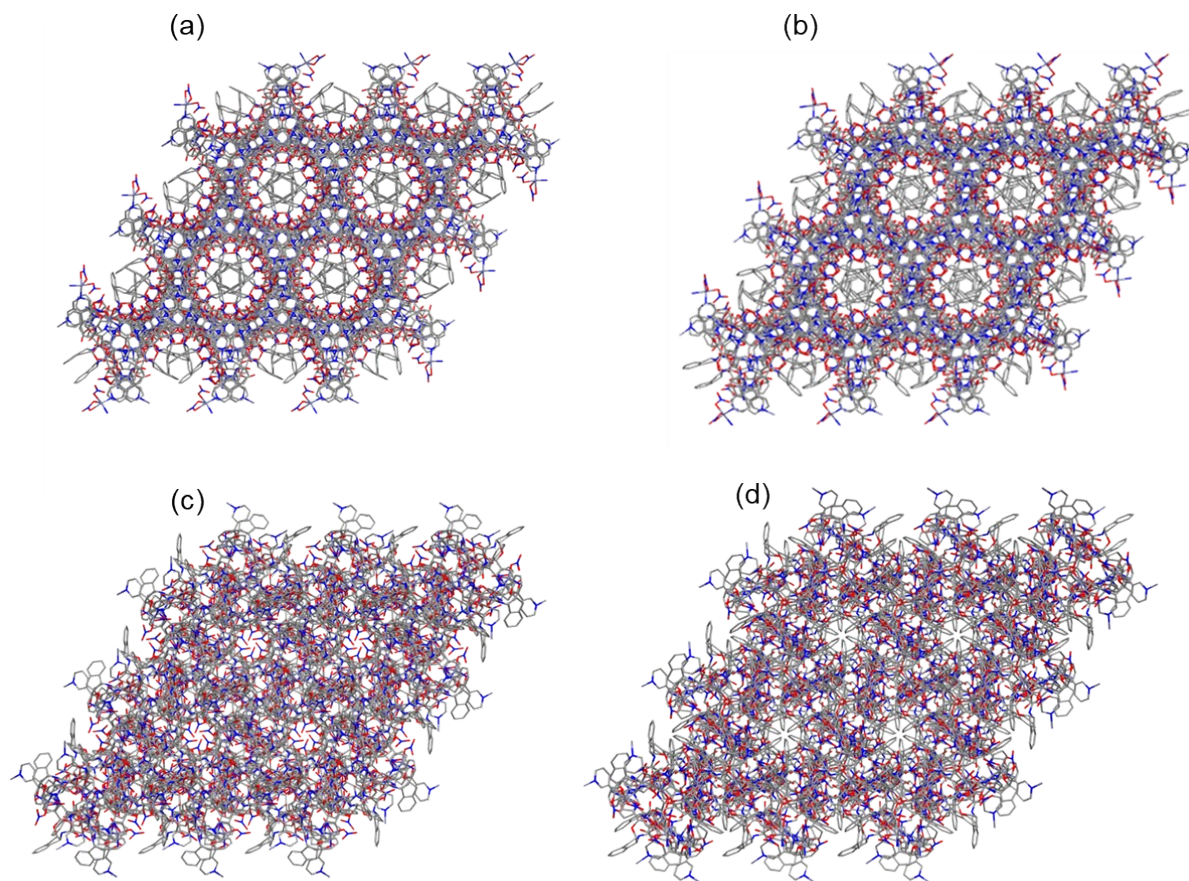

**Fig. S4** Packing structure of  $\text{CH}_2\text{Cl}_2 \cdot 2\text{CH}_3\text{CN} @ [\text{Zn}_3(\text{NO}_3)_6(1S,2R-L)_2]$  (a),  $\text{CH}_2\text{Cl}_2 \cdot 2\text{CH}_3\text{CN} @ [\text{Zn}_3(\text{NO}_3)_6(1R,2S-L)_2]$  (b),  $2\text{CH}_3\text{CN} @ [\text{Zn}_3(\text{NO}_3)_6(1S,2R-L)_2(\text{H}_2\text{O})_2]$  (c), and  $2\text{CH}_3\text{CN} @ [\text{Zn}_3(\text{NO}_3)_6(1R,2S-L)_2(\text{H}_2\text{O})_2]$  (d).

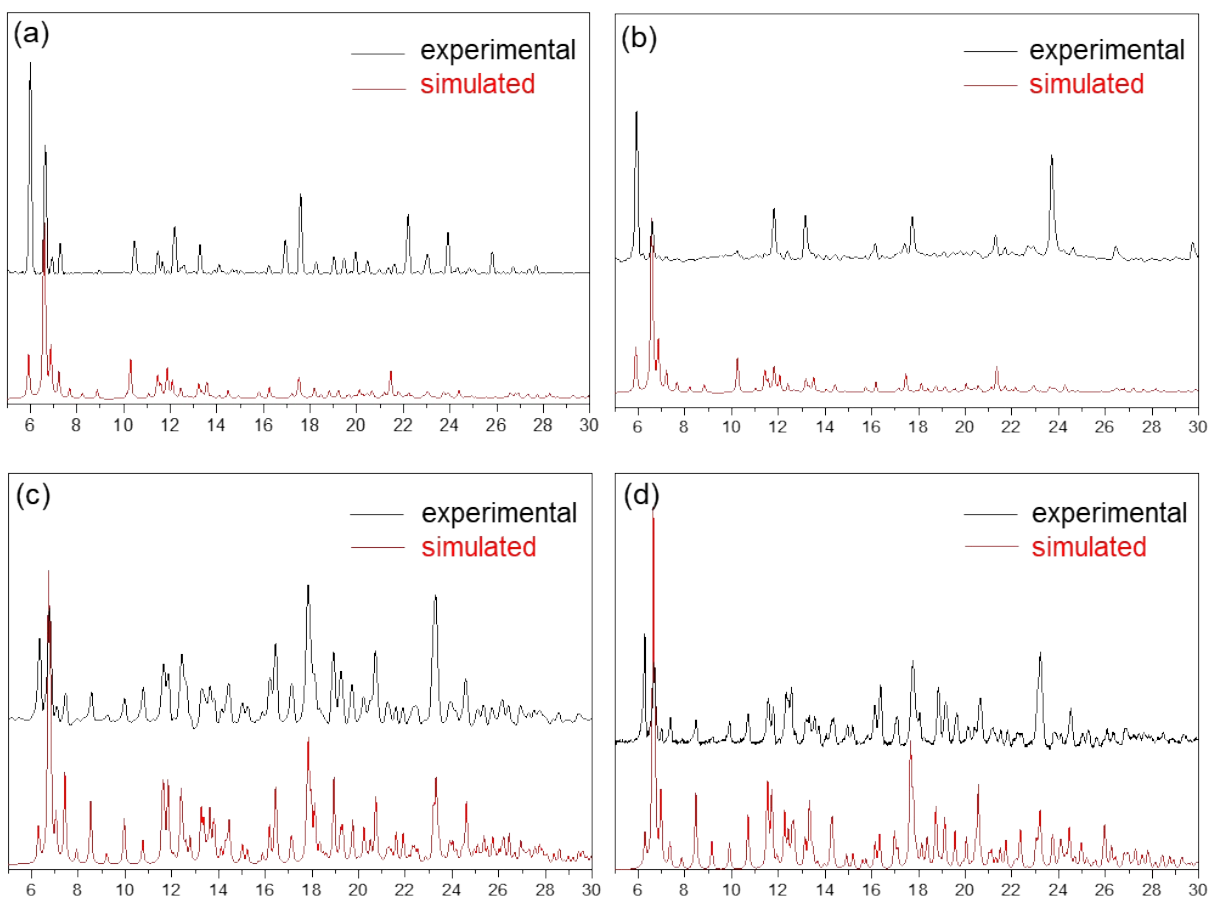

**Fig. S5** PXR D patterns of  $\text{CH}_2\text{Cl}_2 \cdot 2\text{CH}_3\text{CN} @ [\text{Zn}_3(\text{NO}_3)_6(1S,2R-L)_2]$  (a),  $\text{CH}_2\text{Cl}_2 \cdot 2\text{CH}_3\text{CN} @ [\text{Zn}_3(\text{NO}_3)_6(1R,2S-L)_2]$  (b),  $2\text{CH}_3\text{CN} @ [\text{Zn}_3(\text{NO}_3)_6(1S,2R-L)_2(\text{H}_2\text{O})_2]$  (c),  $2\text{CH}_3\text{CN} @ [\text{Zn}_3(\text{NO}_3)_6(1R,2S-L)_2(\text{H}_2\text{O})_2]$  (d).

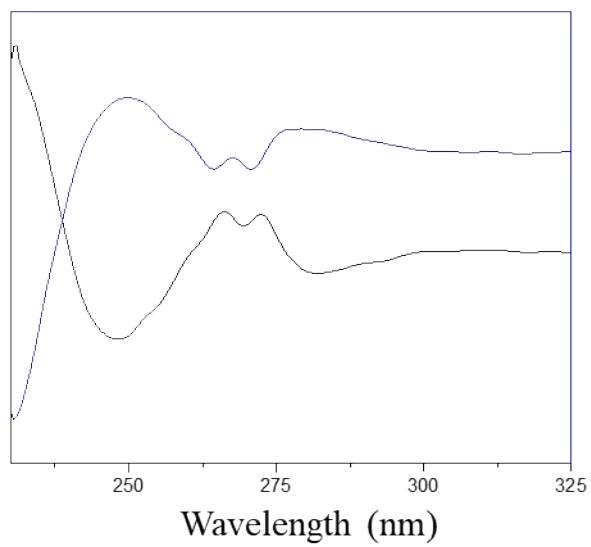

**Fig. S6.** Circular dichroism (CD) spectra of 1*R*,2*S*-L (blue line) and 1*S*,2*R*-L (black line).

(a)

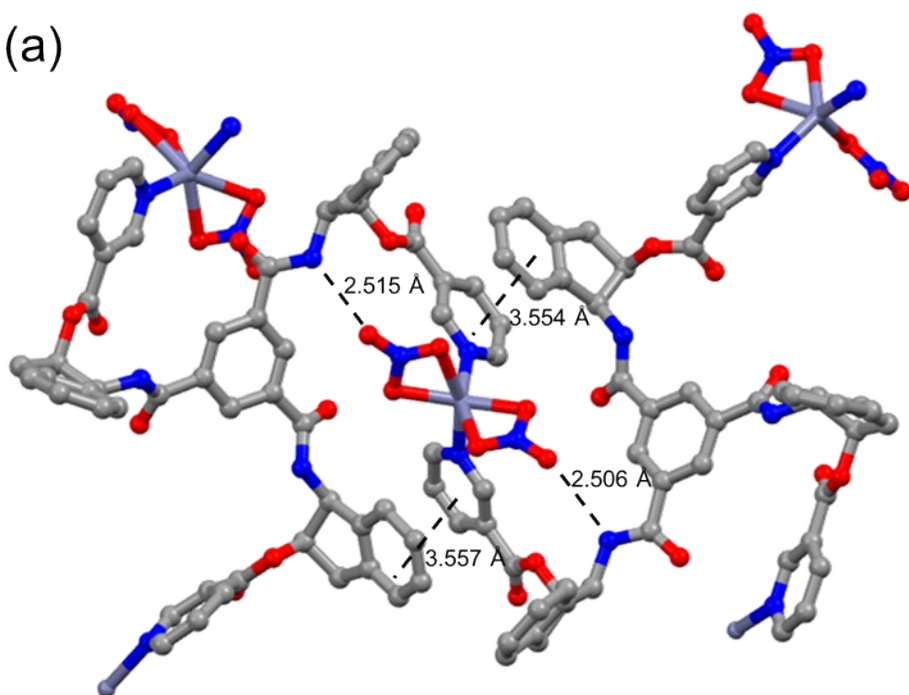

(b)

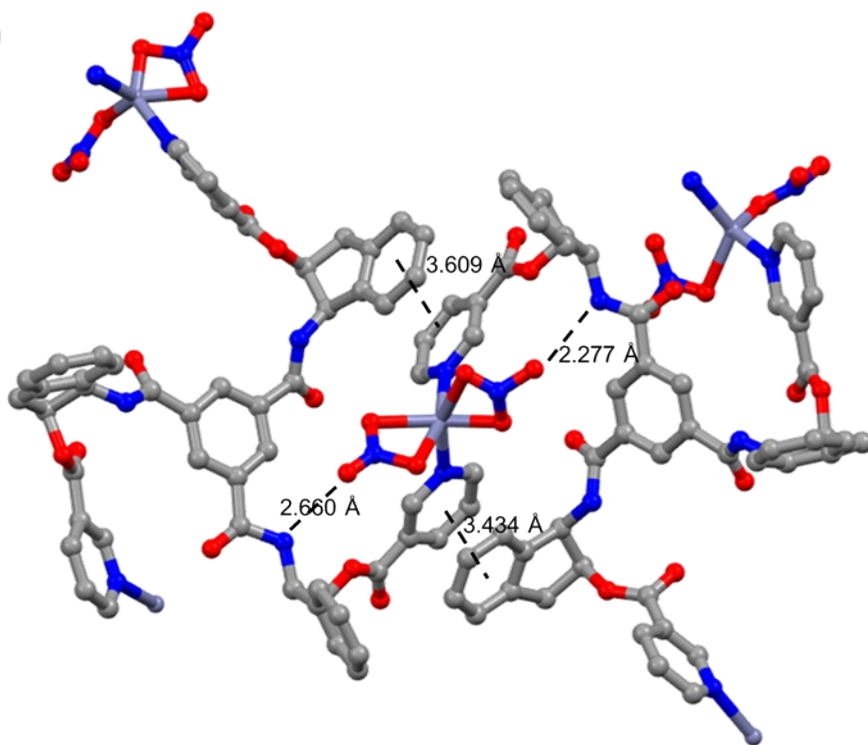



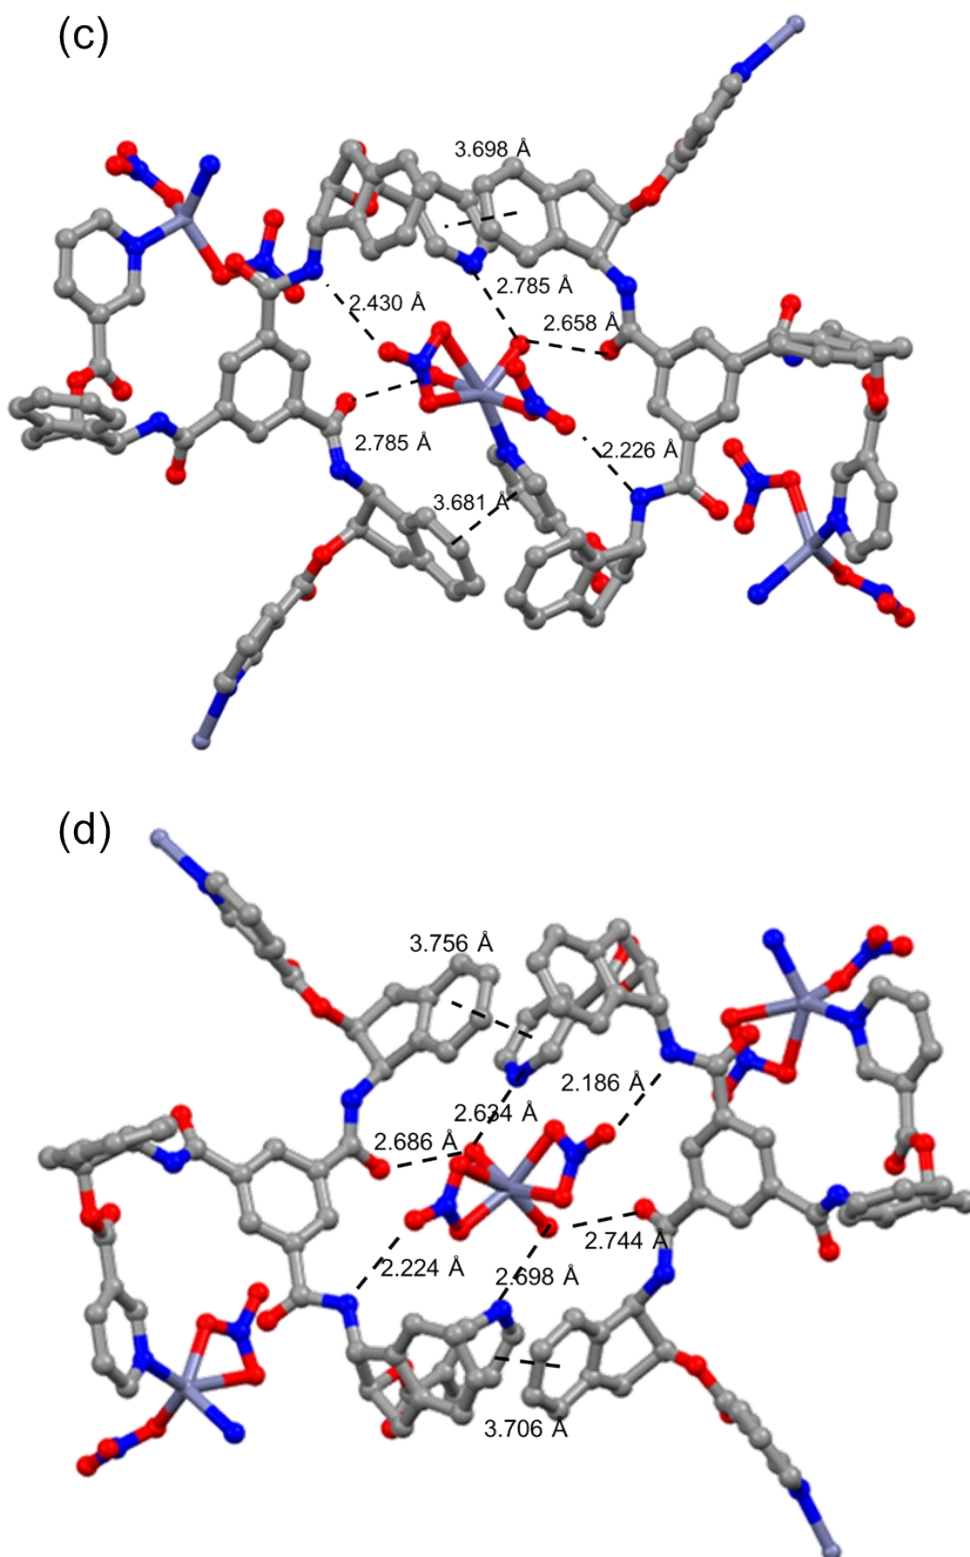

**Fig. S7.** intermolecular hydrogen bond length of  $\text{CH}_2\text{Cl}_2 \cdot 2\text{CH}_3\text{CN} @ [\text{Zn}_3(\text{NO}_3)_6(1S,2R\text{-}L)_2]$  (a),  $\text{CH}_2\text{Cl}_2 \cdot 2\text{CH}_3\text{CN} @ [\text{Zn}_3(\text{NO}_3)_6(1R,2S\text{-}L)_2]$  (b),  $2\text{CH}_3\text{CN} @ [\text{Zn}_3(\text{NO}_3)_6(1S,2R\text{-}L)_2(\text{H}_2\text{O})_2]$  (c),  $2\text{CH}_3\text{CN} @ [\text{Zn}_3(\text{NO}_3)_6(1R,2S\text{-}L)_2(\text{H}_2\text{O})_2]$  (d). (H atoms are omitted for clarity)

**Table S1.** Selected bond lengths and angles for CH<sub>2</sub>Cl<sub>2</sub>·2CH<sub>3</sub>CN@[Zn<sub>3</sub>(NO<sub>3</sub>)<sub>6</sub>(1*S*,2*R*-L)<sub>2</sub>] (a), CH<sub>2</sub>Cl<sub>2</sub>·2CH<sub>3</sub>CN@[Zn<sub>3</sub>(NO<sub>3</sub>)<sub>6</sub>(1*R*,2*S*-L)<sub>2</sub>] (b), 2CH<sub>3</sub>CN@[Zn<sub>3</sub>(NO<sub>3</sub>)<sub>6</sub>(1*S*,2*R*-L)<sub>2</sub>(H<sub>2</sub>O)<sub>2</sub>] (c), 2CH<sub>3</sub>CN@[Zn<sub>3</sub>(NO<sub>3</sub>)<sub>6</sub>(1*R*,2*S*-L)<sub>2</sub>(H<sub>2</sub>O)<sub>2</sub>] (d)

| CH <sub>2</sub> Cl <sub>2</sub> ·2CH <sub>3</sub> CN@[Zn <sub>3</sub> (NO <sub>3</sub> ) <sub>6</sub> (1 <i>S</i> ,2 <i>R</i> -L) <sub>2</sub> ] | CH <sub>2</sub> Cl <sub>2</sub> ·2CH <sub>3</sub> CN@[Zn <sub>3</sub> (NO <sub>3</sub> ) <sub>6</sub> (1 <i>R</i> ,2 <i>S</i> -L) <sub>2</sub> ] | 2CH <sub>3</sub> CN@[Zn <sub>3</sub> (NO <sub>3</sub> ) <sub>6</sub> (1 <i>S</i> ,2 <i>R</i> -L) <sub>2</sub> (H <sub>2</sub> O) <sub>2</sub> ] | 2CH <sub>3</sub> CN@[Zn <sub>3</sub> (NO <sub>3</sub> ) <sub>6</sub> (1 <i>R</i> ,2 <i>S</i> -L) <sub>2</sub> (H <sub>2</sub> O) <sub>2</sub> ] |
|--------------------------------------------------------------------------------------------------------------------------------------------------|--------------------------------------------------------------------------------------------------------------------------------------------------|-------------------------------------------------------------------------------------------------------------------------------------------------|-------------------------------------------------------------------------------------------------------------------------------------------------|
| Zn(1)-O(20)                                                                                                                                      | Zn(1)-N(28A)                                                                                                                                     | Zn(1)-O(16)                                                                                                                                     | Zn(1A)-N(23A)                                                                                                                                   |
| Zn(1)-N(2)                                                                                                                                       | Zn(1)-O(17)                                                                                                                                      | Zn(1)-O(12)                                                                                                                                     | Zn(1A)-O(77A)                                                                                                                                   |
| Zn(1)-N(8) <sup>#1</sup>                                                                                                                         | Zn(1)-O(17D)                                                                                                                                     | Zn(1)-O(16D)                                                                                                                                    | Zn(1A)-O(72A)                                                                                                                                   |
| Zn(1)-O(19)                                                                                                                                      | Zn(1)-O(16D)                                                                                                                                     | Zn(1)-N(28A)                                                                                                                                    | Zn(1A)-N(65A) <sup>#1</sup>                                                                                                                     |
| Zn(1)-N(14)                                                                                                                                      | Zn(1)-O(12)                                                                                                                                      | Zn(1)-N(70A) <sup>#1</sup>                                                                                                                      | Zn(1B)-N(23B)                                                                                                                                   |
| Zn(2)-N(4) <sup>#2</sup>                                                                                                                         | Zn(1)-N(70A) <sup>#1</sup>                                                                                                                       | Zn(1)-O(16E)                                                                                                                                    | Zn(1B)-N(44B) <sup>#2</sup>                                                                                                                     |
| Zn(2)-O(03X)                                                                                                                                     | Zn(1)-O(12D)                                                                                                                                     | Zn(2)-O(29)                                                                                                                                     | Zn(1B)-O(77B)                                                                                                                                   |
| Zn(2)-O(78)                                                                                                                                      | Zn(1)-C(27A)                                                                                                                                     | Zn(2)-O(22D)                                                                                                                                    | Zn(1B)-O(72B)                                                                                                                                   |
| Zn(2)-N(6)                                                                                                                                       | Zn(2)-O(22)                                                                                                                                      | Zn(2)-O(22)                                                                                                                                     | Zn(1B)-O(74B)                                                                                                                                   |
| Zn(2)-O(79)                                                                                                                                      | Zn(2)-N(49A)                                                                                                                                     | Zn(2)-O(26)                                                                                                                                     | Zn(1C)-O(12C)                                                                                                                                   |
| Zn(3)-O(28)                                                                                                                                      | Zn(2)-N(28B)                                                                                                                                     | Zn(2)-N(28B)                                                                                                                                    | Zn(1C)-O(11C)                                                                                                                                   |
| Zn(3)-N(10)                                                                                                                                      | Zn(2)-O(28)                                                                                                                                      | Zn(2)-O(30)                                                                                                                                     | Zn(1C)-O(3C)                                                                                                                                    |
| Zn(3)-N(19) <sup>#3</sup>                                                                                                                        | Zn(2)-O(26)                                                                                                                                      | Zn(2)-O(27)                                                                                                                                     | Zn(1C)-O(7C)                                                                                                                                    |
| Zn(3)-O(25)                                                                                                                                      | Zn(2)-O(23)                                                                                                                                      | Zn(3)-O(32D)                                                                                                                                    | Zn(1C)-O(9C)                                                                                                                                    |
| Zn(3)-O(26)                                                                                                                                      | Zn(3)-O(32)                                                                                                                                      | Zn(3)-N(49B)                                                                                                                                    | Zn(1C)-O(5C)                                                                                                                                    |
|                                                                                                                                                  | Zn(3)-O(33)                                                                                                                                      | Zn(3)-O(36)                                                                                                                                     |                                                                                                                                                 |
| O(20)-Zn(1)-N(2)                                                                                                                                 | Zn(3)-N(49B)                                                                                                                                     | Zn(3)-O(32)                                                                                                                                     | N(23A)-Zn(1A)-O(77A)                                                                                                                            |
| O(20)-Zn(1)-N(8) <sup>#1</sup>                                                                                                                   | Zn(3)-O(36D)                                                                                                                                     | Zn(3)-O(36D)                                                                                                                                    | N(23A)-Zn(1A)-O(72A)                                                                                                                            |
| N(2)-Zn(1)-N(8) <sup>#1</sup>                                                                                                                    | Zn(3)-N(31)                                                                                                                                      | Zn(3)-N(70B) <sup>#2</sup>                                                                                                                      | O(77A)-Zn(1A)-O(72A)                                                                                                                            |
| O(20)-Zn(1)-O(22)                                                                                                                                | Zn(3)-O(32D)                                                                                                                                     |                                                                                                                                                 | N(23A)-Zn(1A)-(65A) <sup>#1</sup>                                                                                                               |
| N(2)-Zn(1)-O(22)                                                                                                                                 | Zn(3)-O(36)                                                                                                                                      | O(16)-Zn(1)-O(12)                                                                                                                               | O(77A)-Zn(1A)-N(65A) <sup>#1</sup>                                                                                                              |
| N(8) <sup>#1</sup> -Zn(1)-O(22)                                                                                                                  | Zn(3)-N(70B) <sup>#1</sup>                                                                                                                       | O(12)-Zn(1)-O(16D)                                                                                                                              | O(72A)-Zn(1A)-(65A) <sup>#1</sup>                                                                                                               |
| O(20)-Zn(1)-O(19)                                                                                                                                |                                                                                                                                                  | O(16)-Zn(1)-N(28A)                                                                                                                              | N(23B)-Zn(1B)-N(44B) <sup>#2</sup>                                                                                                              |
| N(2)-Zn(1)-O(19)                                                                                                                                 | N(28A)-Zn(1)-O(17)                                                                                                                               | O(12)-Zn(1)-N(28A)                                                                                                                              | N(44B) <sup>#2</sup> -Zn(1B)-O(77B)                                                                                                             |
| N(8) <sup>#1</sup> -Zn(1)-O(19)                                                                                                                  | N(28A)-Zn(1)-O(17D)                                                                                                                              | O(16D)-Zn(1)-N(28A)                                                                                                                             | N(23B)-Zn(1B)-O(72B)                                                                                                                            |
| O(22)-Zn(1)-O(19)                                                                                                                                | N(28A)-Zn(1)-O(16D)                                                                                                                              | O(16)-Zn(1)-N(70A) <sup>#1</sup>                                                                                                                | N(44B) <sup>#2</sup> -Zn(1B)-O(72B)                                                                                                             |
| O(20)-Zn(1)-O(23)                                                                                                                                | O(17D)-Zn(1)-O(16D)                                                                                                                              | O(12)-Zn(1)-N(70A) <sup>#1</sup>                                                                                                                | N(44B) <sup>#2</sup> -Zn(1B)-O(72B)                                                                                                             |
| N(2)-Zn(1)-O(23)                                                                                                                                 | N(28A)-Zn(1)-O(12)                                                                                                                               | N(28A)-Zn(1)-N(70A) <sup>#1</sup>                                                                                                               | O(77B)-Zn(1B)-O(72B)                                                                                                                            |
| N(8) <sup>#1</sup> -Zn(1)-O(23)                                                                                                                  | O(17)-Zn(1)-O(12)                                                                                                                                | O(12)-Zn(1)-O(16E)                                                                                                                              | N(23B)-Zn(1B)-O(74B)                                                                                                                            |
| O(22)-Zn(1)-O(23)                                                                                                                                | N(28A)-Zn(1)-N(70A) <sup>#1</sup>                                                                                                                | N(28A)-Zn(1)-O(16E)                                                                                                                             | N(44B) <sup>#2</sup> -Zn(1B)-O(74B)                                                                                                             |
| O(19)-Zn(1)-O(23)                                                                                                                                | O(17)-Zn(1)-N(70A) <sup>#1</sup>                                                                                                                 | N(70A) <sup>#1</sup> -Zn(1)-O(16E)                                                                                                              | O(77B)-Zn(1B)-O(74B)                                                                                                                            |
| O(20)-Zn(1)-N(14)                                                                                                                                | O(12)-Zn(1)-N(70A) <sup>#1</sup>                                                                                                                 | O(29)-Zn(2)-O(22D)                                                                                                                              | O(72B)-Zn(1B)-O(74B)                                                                                                                            |
| N(2)-Zn(1)-N(14)                                                                                                                                 | N(28A)-Zn(1)-O(12D)                                                                                                                              | O(29)-Zn(2)-O(22)                                                                                                                               | O(12C)-Zn(1C)-O(11C)                                                                                                                            |
| N(8) <sup>#1</sup> -Zn(1)-N(14)                                                                                                                  | O(17D)-Zn(1)-O(12D)                                                                                                                              | O(29)-Zn(2)-O(26)                                                                                                                               | O(12C)-Zn(1C)-O(3C)                                                                                                                             |
| O(22)-Zn(1)-N(14)                                                                                                                                | O(16D)-Zn(1)-O(12D)                                                                                                                              | O(22D)-Zn(2)-O(26)                                                                                                                              | O(11C)-Zn(1C)-O(3C)                                                                                                                             |
| O(19)-Zn(1)-N(14)                                                                                                                                | N(70A) <sup>#1</sup> -Zn(1)-O(12D)                                                                                                               | O(22)-Zn(2)-O(26)                                                                                                                               | O(12C)-Zn(1C)-O(7C)                                                                                                                             |
| O(23)-Zn(1)-N(14)                                                                                                                                | N(28A)-Zn(1)-C(27A)                                                                                                                              | O(29)-Zn(2)-N(28B)                                                                                                                              | O(11C)-Zn(1C)-O(7C)                                                                                                                             |
| N(4) <sup>#2</sup> -Zn(2)-O(03X)                                                                                                                 | O(17)-Zn(1)-C(27A)                                                                                                                               | O(22D)-Zn(2)-N(28B)                                                                                                                             | O(3C)-Zn(1C)-O(7C)                                                                                                                              |
| N(4) <sup>#2</sup> -Zn(2)-O(78)                                                                                                                  | O(17D)-Zn(1)-C(27A)                                                                                                                              | O(22)-Zn(2)-N(28B)                                                                                                                              | O(12C)-Zn(1C)-O(9C)                                                                                                                             |
| O(03X)-Zn(2)-O(78)                                                                                                                               | O(16D)-Zn(1)-C(27A)                                                                                                                              | O(26)-Zn(2)-N(28B)                                                                                                                              | O(11C)-Zn(1C)-O(9C)                                                                                                                             |
| N(4) <sup>#2</sup> -Zn(2)-N(6)                                                                                                                   | O(12)-Zn(1)-C(27A)                                                                                                                               | O(29)-Zn(2)-O(30)                                                                                                                               | O(3C)-Zn(1C)-O(9C)                                                                                                                              |
| O(03X)-Zn(2)-N(6)                                                                                                                                | N(70A) <sup>#1</sup> -Zn(1)-C(27A)                                                                                                               | O(22D)-Zn(2)-O(30)                                                                                                                              | O(7C)-Zn(1C)-O(9C)                                                                                                                              |
| O(78)-Zn(2)-N(6)                                                                                                                                 | O(12D)-Zn(1)-C(27A)                                                                                                                              | O(22)-Zn(2)-O(30)                                                                                                                               | O(12C)-Zn(1C)-O(5C)                                                                                                                             |
| N(4) <sup>#2</sup> -Zn(2)-O(79)                                                                                                                  | O(22)-Zn(2)-N(49A)                                                                                                                               | O(26)-Zn(2)-O(30)                                                                                                                               | O(11C)-Zn(1C)-O(5C)                                                                                                                             |
| O(03X)-Zn(2)-O(79)                                                                                                                               | O(22)-Zn(2)-N(28B)                                                                                                                               | N(28B)-Zn(2)-O(30)                                                                                                                              | O(3C)-Zn(1C)-O(5C)                                                                                                                              |
| O(78)-Zn(2)-O(79)                                                                                                                                | N(49A)-Zn(2)-N(28B)                                                                                                                              | O(29)-Zn(2)-O(27)                                                                                                                               | O(7C)-Zn(1C)-O(5C)                                                                                                                              |
| N(6)-Zn(2)-O(79)                                                                                                                                 | O(22)-Zn(2)-O(28)                                                                                                                                | O(22D)-Zn(2)-O(27)                                                                                                                              | O(9C)-Zn(1C)-O(5C)                                                                                                                              |
| O(28)-Zn(3)-N(10)                                                                                                                                | N(49A)-Zn(2)-O(28)                                                                                                                               | O(22)-Zn(2)-O(27)                                                                                                                               |                                                                                                                                                 |
| O(28)-Zn(3)-N(19) <sup>#3</sup>                                                                                                                  | N(28B)-Zn(2)-O(28)                                                                                                                               | O(26)-Zn(2)-O(27)                                                                                                                               |                                                                                                                                                 |
| N(10)-Zn(3)-N(19) <sup>#3</sup>                                                                                                                  | O(22)-Zn(2)-O(26)                                                                                                                                | N(28B)-Zn(2)-O(27)                                                                                                                              |                                                                                                                                                 |

O(28)-Zn(3)-O(25)  
N(10)-Zn(3)-O(25)  
N(19)<sup>#3</sup>-Zn(3)-O(25)  
O(28)-Zn(3)-O(26)  
N(10)-Zn(3)-O(26)  
N(19)<sup>#3</sup>-Zn(3)-O(26)  
O(25)-Zn(3)-O(26)

N(49A)-Zn(2)-O(26)  
N(28B)-Zn(2)-O(26)  
O(28)-Zn(2)-O(26)  
O(22)-Zn(2)-O(23)  
N(49A)-Zn(2)-O(23)  
N(28B)-Zn(2)-O(23)  
O(28)-Zn(2)-O(23)  
O(26)-Zn(2)-O(23)  
O(32)-Zn(3)-O(33)  
O(32)-Zn(3)-N(49B)  
O(33)-Zn(3)-N(49B)  
N(49B)-Zn(3)-O(36D)  
O(32)-Zn(3)-N(31)  
O(33)-Zn(3)-N(31)  
N(49B)-Zn(3)-N(31)  
N(49B)-Zn(3)-O(32D)  
O(36D)-Zn(3)-O(32D)  
O(32)-Zn(3)-O(36)  
O(33)-Zn(3)-O(36)  
N(49B)-Zn(3)-O(36)  
N(31)-Zn(3)-O(36)  
O(32)-Zn(3)-N(70B)<sup>#1</sup>  
O(33)-Zn(3)-N(70B)<sup>#1</sup>  
N(49B)-Zn(3)-(70B)<sup>#1</sup>  
O(36D)-Zn(3)-(70B)<sup>#1</sup>  
N(31)-Zn(3)-N(70B)<sup>#1</sup>  
O(32D)-Zn(3)-(70B)<sup>#1</sup>  
O(36)-Zn(3)-N(70B)<sup>#1</sup>

O(30)-Zn(2)-O(27)  
O(32D)-Zn(3)-N(49B)  
N(49B)-Zn(3)-O(36)  
N(49B)-Zn(3)-O(32)  
O(36)-Zn(3)-O(32)  
O(32D)-Zn(3)-O(36D)  
N(49B)-Zn(3)-O(36D)  
O(32D)-Zn(3)-N(70B)<sup>#2</sup>  
N(49B)-Zn(3)-N(70B)<sup>#2</sup>  
O(36)-Zn(3)-N(70B)<sup>#2</sup>  
O(32)-Zn(3)-N(70B)<sup>#2</sup>  
O(36D)-Zn(3)-N(70B)<sup>#2</sup>

---

<sup>#1</sup> x-y+1,x,z+1/6  
<sup>#2</sup> x-1,y-1,z  
<sup>#3</sup> x-1,y,z

<sup>#1</sup> x-1,y,z  
<sup>#2</sup> x+1,y,z

<sup>#1</sup> x,y-1,z  
<sup>#2</sup> x,y+1,z

<sup>#1</sup> x+1,y,z  
<sup>#2</sup> x,y-1,z  
<sup>#3</sup> x-1,y,z
